# Supplementary material for: Genomic population structure associated with repeated escape of Salmonella enterica ATCC14028s from the laboratory into nature
Source: PubMed Central journal article supplement (PMC8496778; doi:10.1371/journal.pgen.1009820), 2021-09-27
Supplement: pgen.1009820.s009.pdf [file pgen.1009820.s009.pdf]

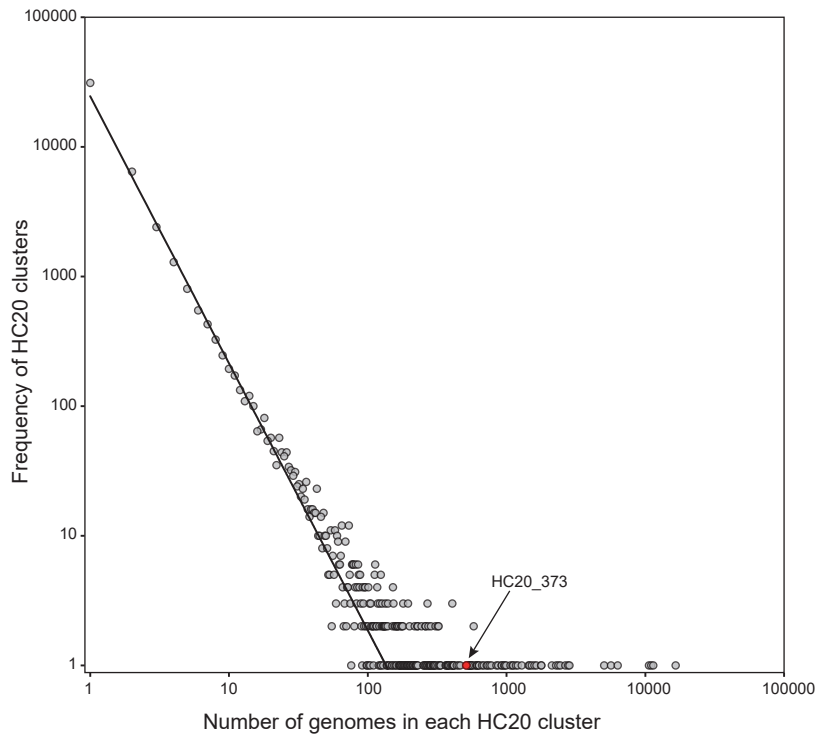

**S1 Fig.** Log-log plot of frequency of *Salmonella* HC20 clusters by numbers of genomes in each cluster. This figure is an alternative representation of the data summarized in Fig 5A.
