# Supplementary material for: Genomic population structure associated with repeated escape of Salmonella enterica ATCC14028s from the laboratory into nature
Source: PubMed Central journal article supplement (PMC8496778; doi:10.1371/journal.pgen.1009820), 2021-09-27

**S3 Fig.** Bayesian BEAST [40] temporal dating of ATCC14028s and its natural derivatives. As Fig 6 except that EnteroBase genome barcodes are shown in miniscule fonts at the right of the tree.

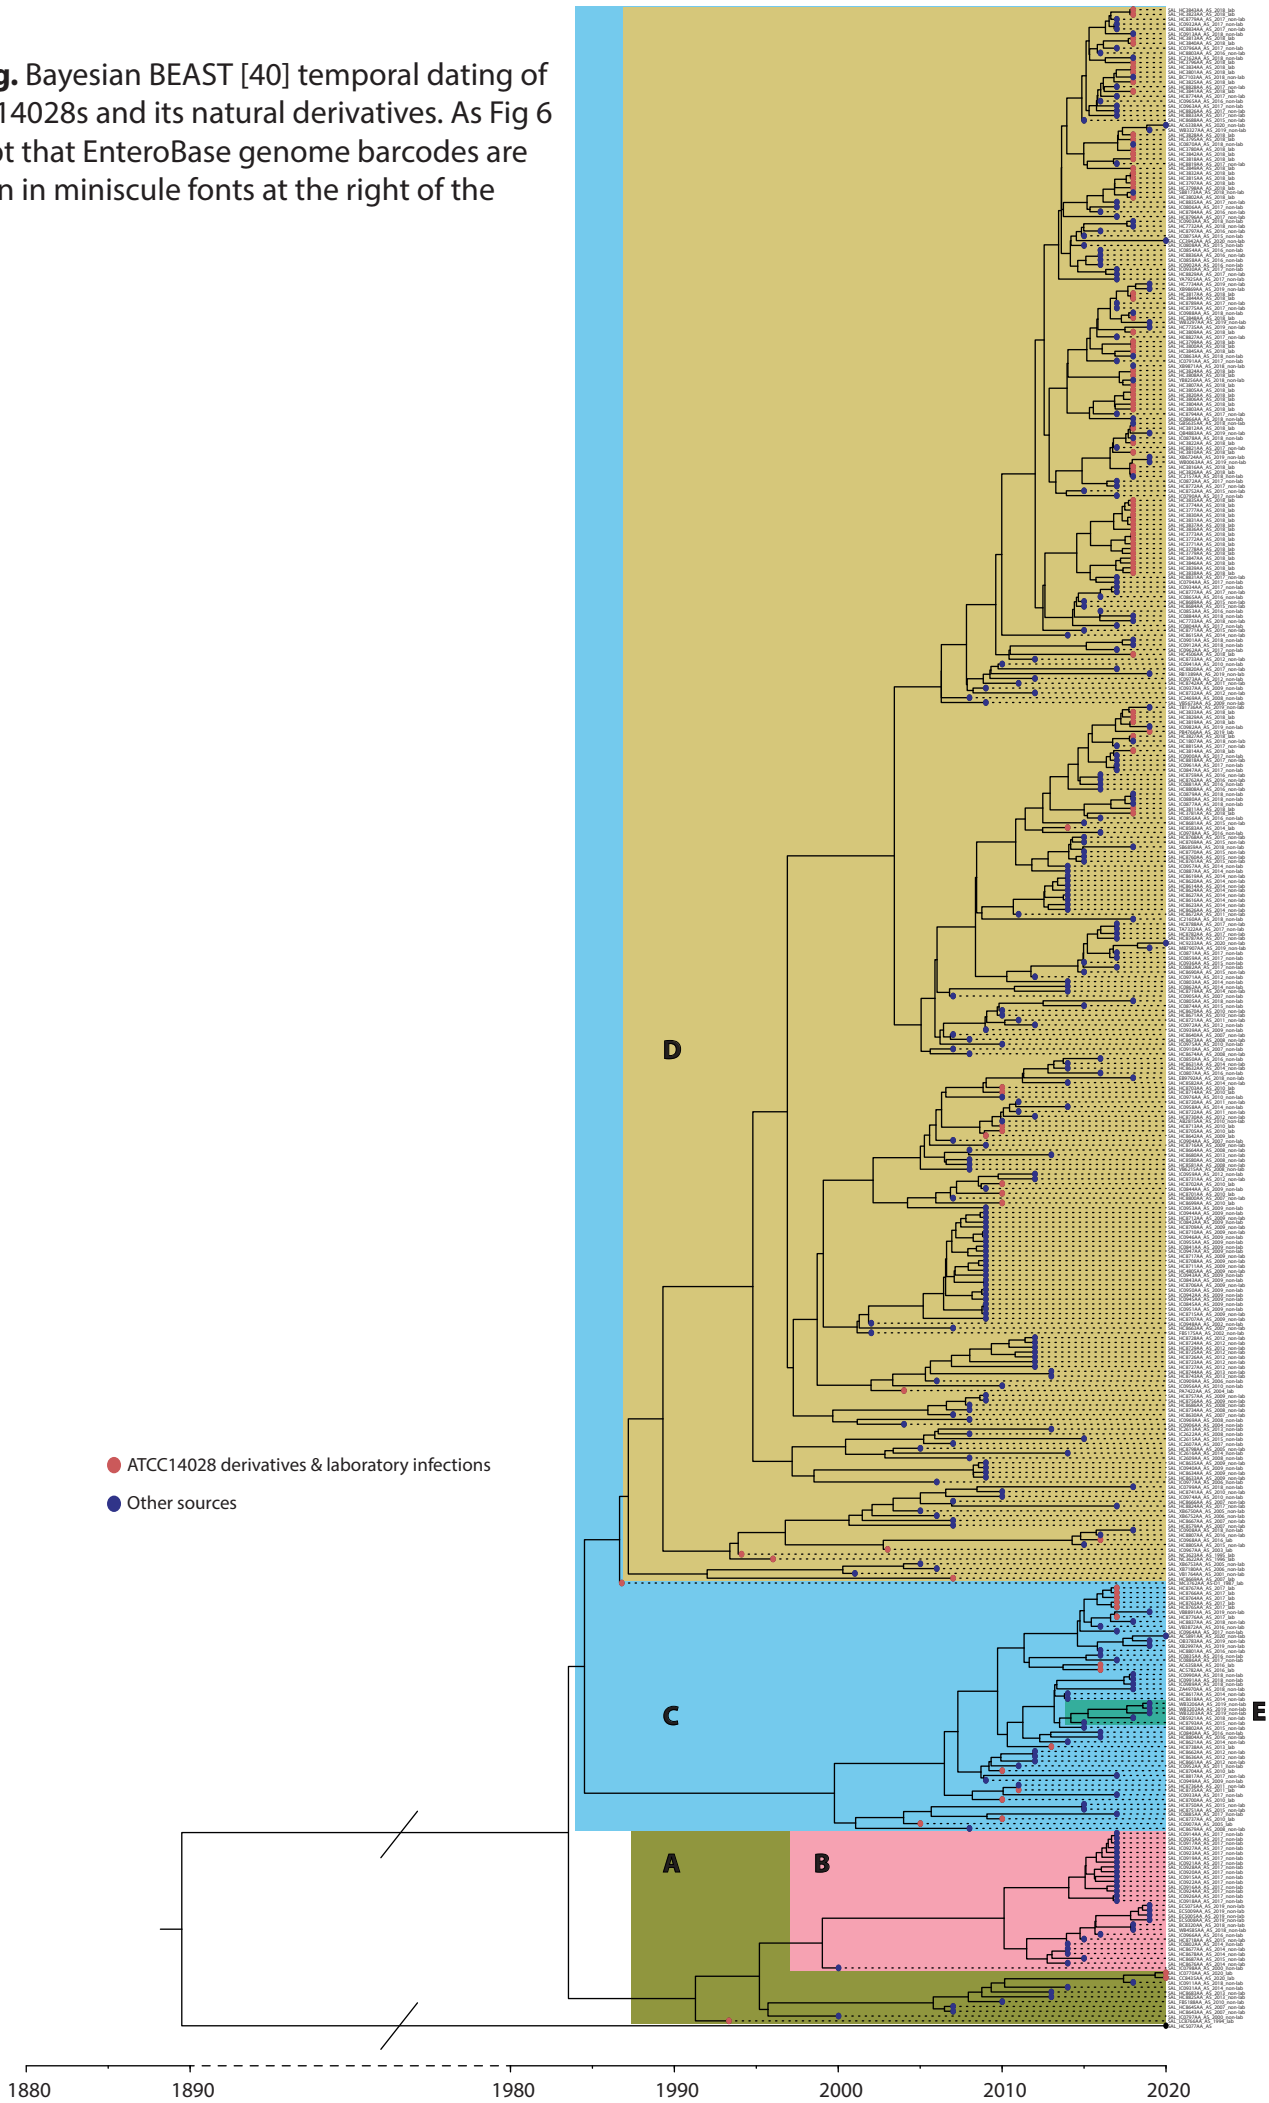

Supplement: pgen.1009820.s011.pdf [file pgen.1009820.s011.pdf]
