# Supplementary material for: Genomic population structure associated with repeated escape of Salmonella enterica ATCC14028s from the laboratory into nature
Source: PubMed Central journal article supplement (PMC8496778; doi:10.1371/journal.pgen.1009820), 2021-09-27
Supplement: pgen.1009820.s013.pdf [file pgen.1009820.s013.pdf]

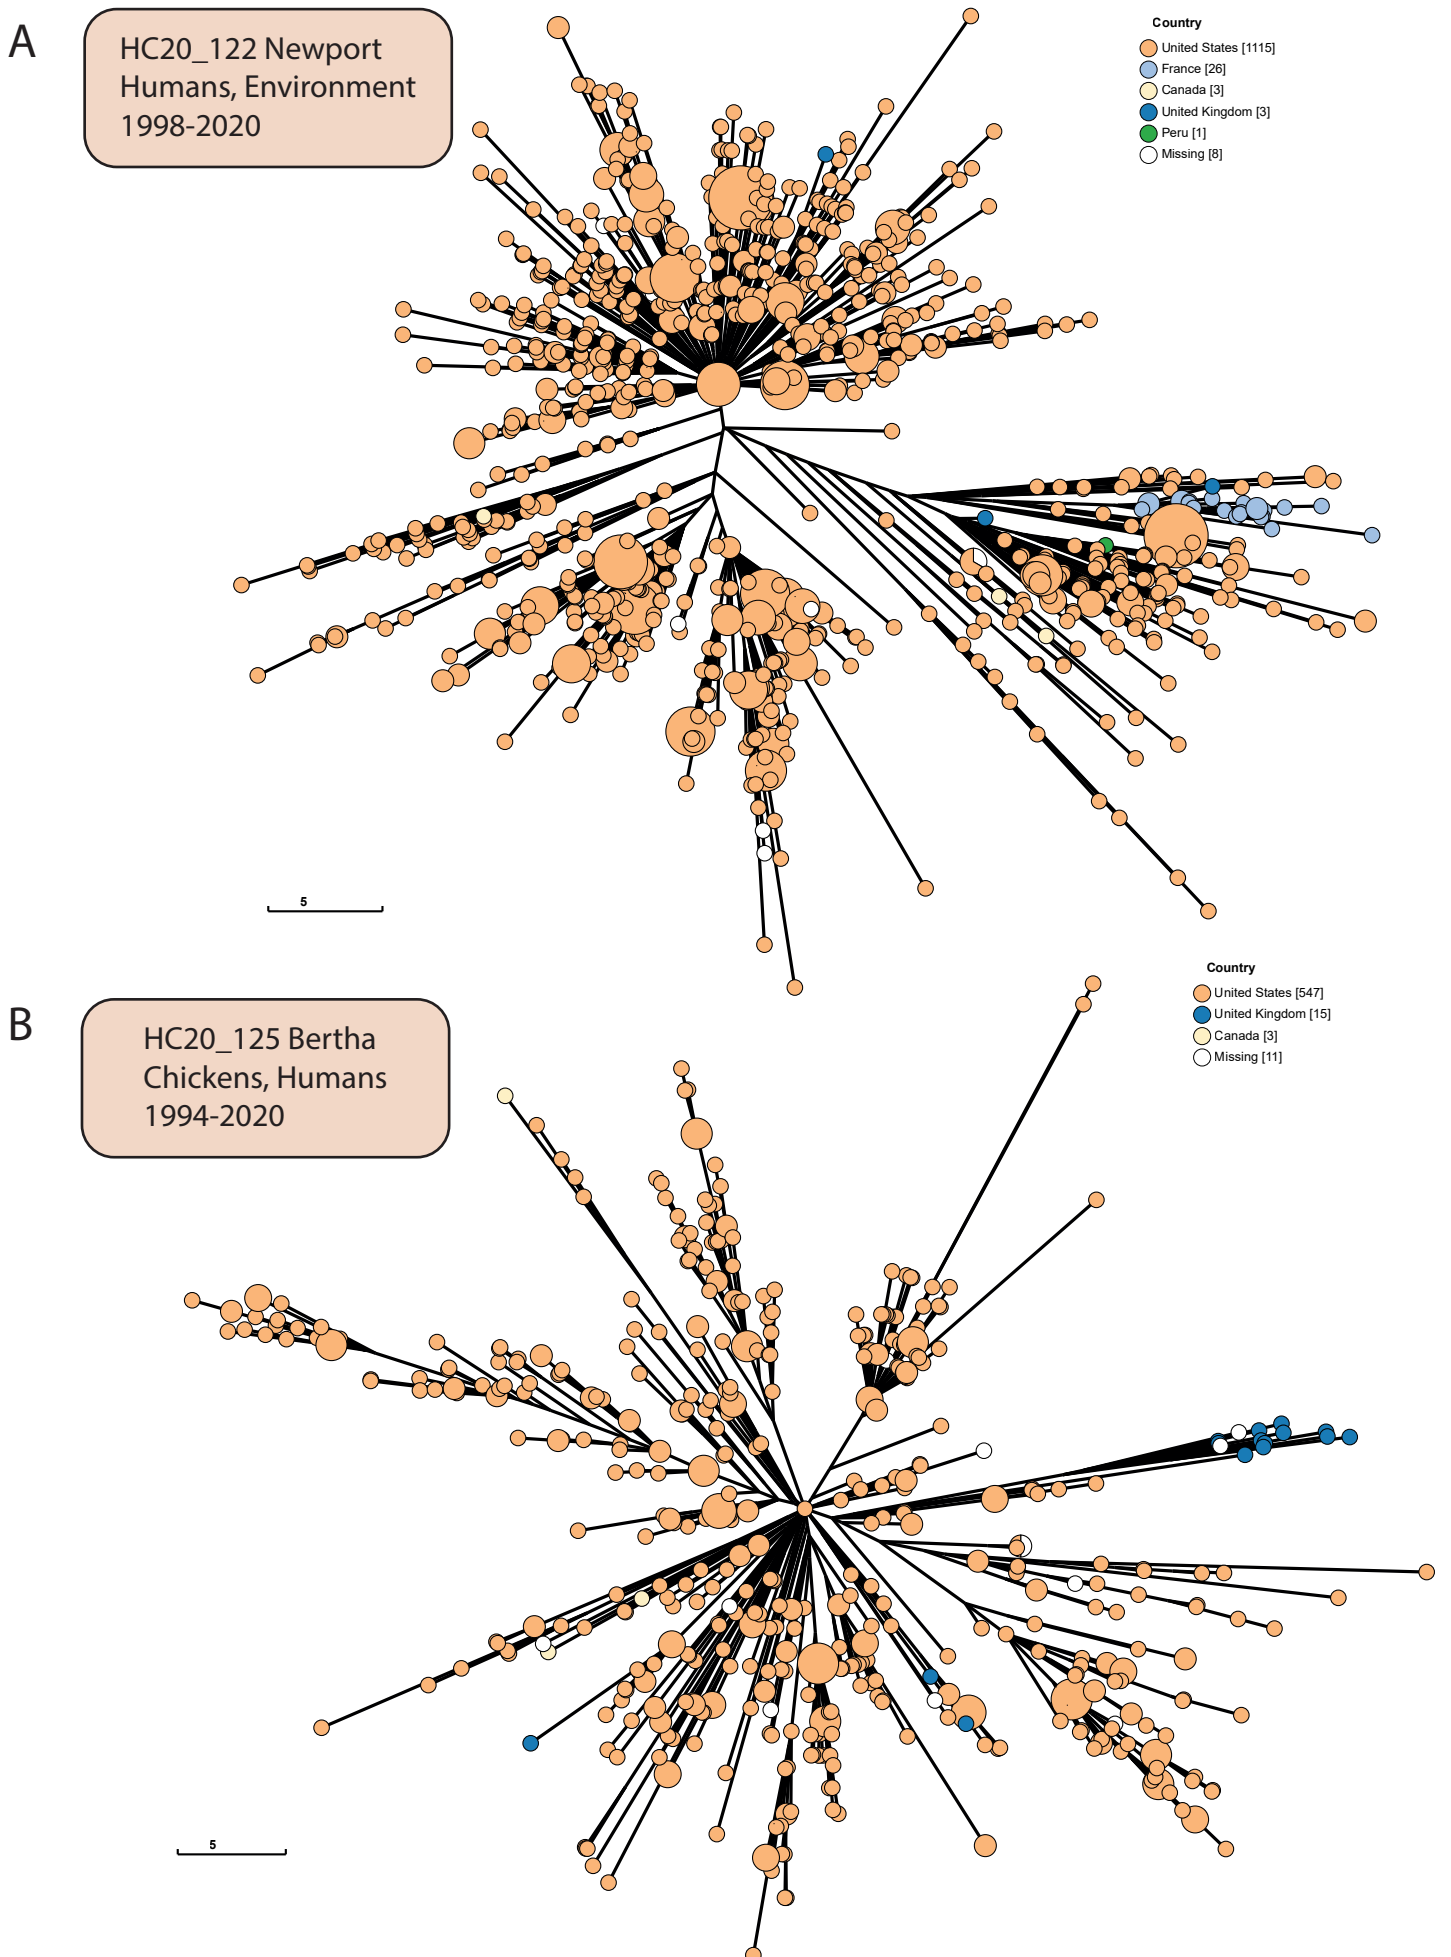

**S5 Fig.** Ninja NJ [visualization of allelic differences in the 3002 core genes of the cgMLST *Salmonella* scheme with Grape-Tree for genomes within A) HC20\_122 and B) HC20\_125. Further information on these HC20 clusters is summarized in Tables 2, 4 and 5, and an interactive version of both trees can be accessed at [https://enterobase.warwick.ac.uk/ms\\_tree?tree\\_id=45447](https://enterobase.warwick.ac.uk/ms_tree?tree_id=45447) and [https://enterobase.warwick.ac.uk/ms\\_tree?tree\\_id=45450](https://enterobase.warwick.ac.uk/ms_tree?tree_id=45450).
