# Supplementary material for: Genomic population structure associated with repeated escape of Salmonella enterica ATCC14028s from the laboratory into nature
Source: PubMed Central journal article supplement (PMC8496778; doi:10.1371/journal.pgen.1009820), 2021-09-27
Supplement: pgen.1009820.s014.pdf [file pgen.1009820.s014.pdf]

HC20\_557 Muenchen  
Chickens, Swine  
1988-2020

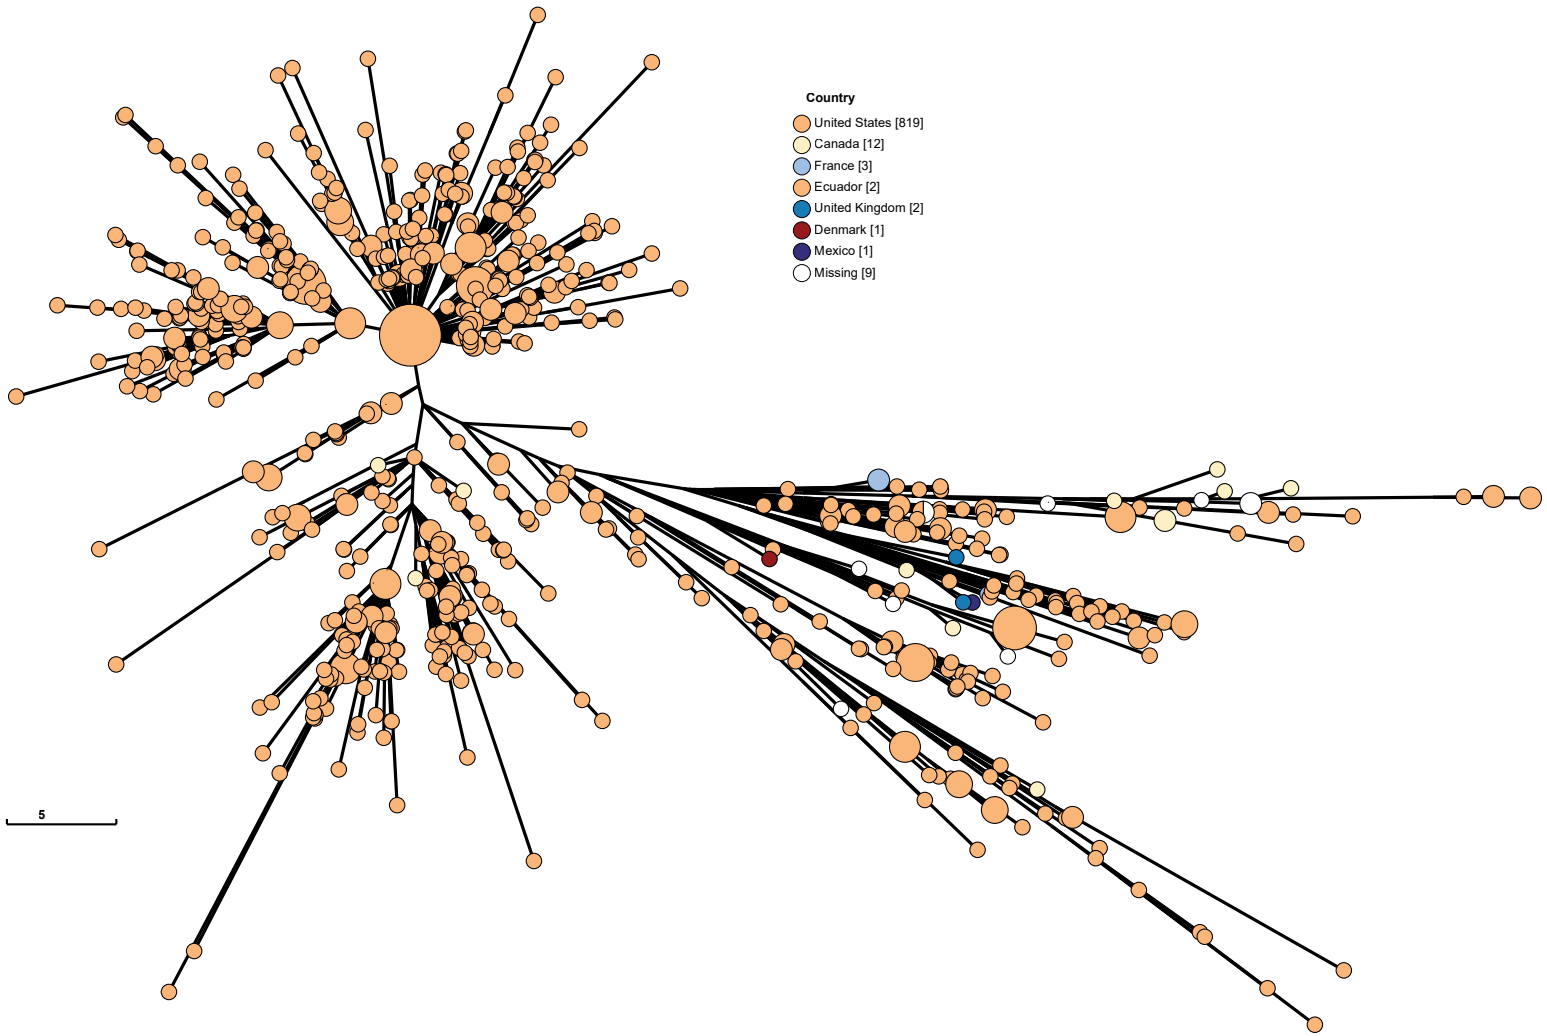

HC20\_710 Johannesburg  
Swine  
2003-2020

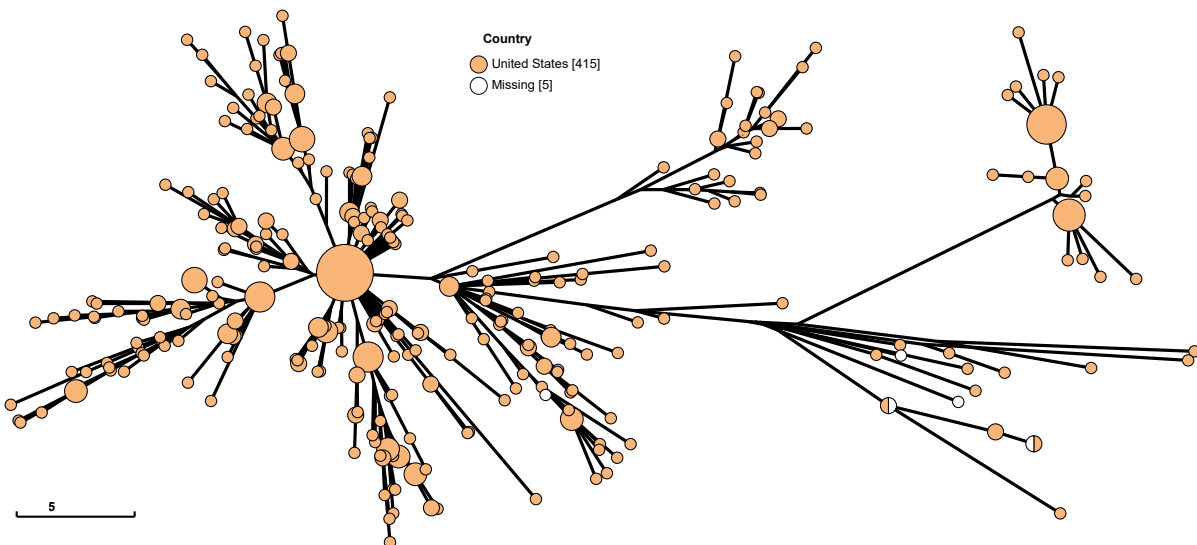

**S6 Fig.** Ninja NJ visualization of allelic differences in the 3002 core genes of the cgMLST *Salmonella* scheme with GrapeTree for genomes within A) HC20\_557 and B) HC20\_710. Further information on these HC20 clusters is summarized in Tables 2, 4 and 5, and an interactive version of both trees can be accessed at [https://enterobase.warwick.ac.uk/ms\\_tree?tree\\_id=45446](https://enterobase.warwick.ac.uk/ms_tree?tree_id=45446) and [https://enterobase.warwick.ac.uk/ms\\_tree?tree\\_id=45445](https://enterobase.warwick.ac.uk/ms_tree?tree_id=45445).
