# Supplementary material for: Genomic population structure associated with repeated escape of Salmonella enterica ATCC14028s from the laboratory into nature
Source: PubMed Central journal article supplement (PMC8496778; doi:10.1371/journal.pgen.1009820), 2021-09-27
Supplement: pgen.1009820.s016.pdf [file pgen.1009820.s016.pdf]

A

HC20\_4179 Newport  
Human (California Onions)  
2000-2020

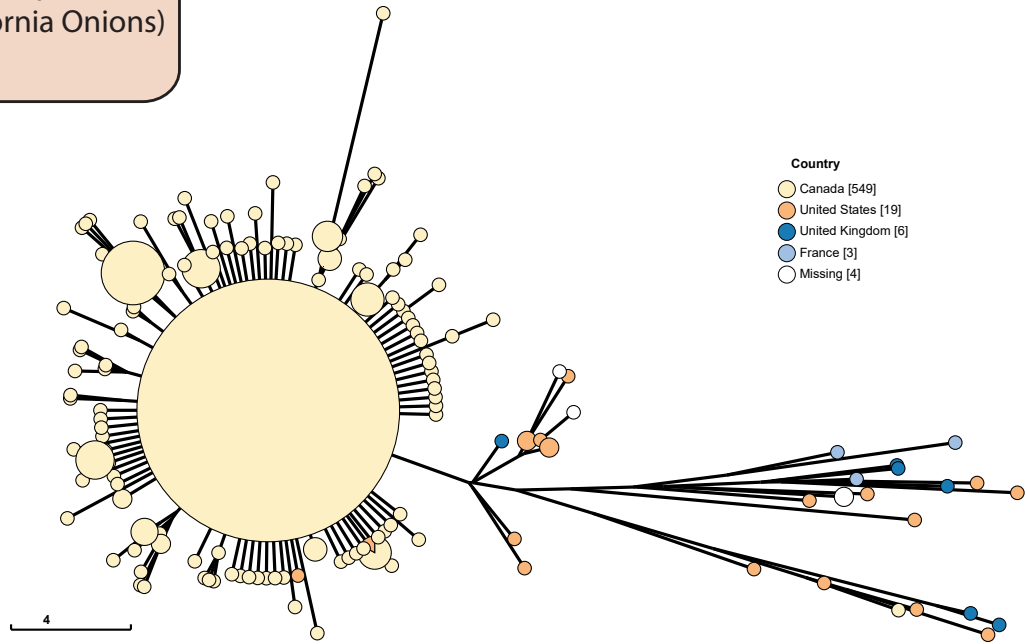

B

HC20\_39803 Hadar  
Human  
2000-2018

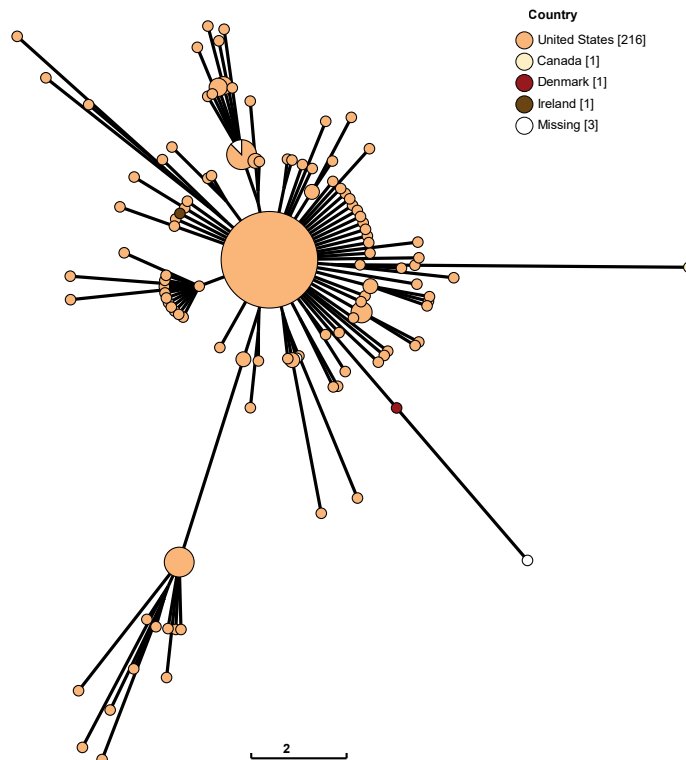

**S8 Fig.** Ninja NJ visualization of allelic differences in the 3002 core genes of the cgMLST *Salmonella* scheme with GrapeTree for genomes within A) HC20\_39803 and B) HC20\_4179. Further information on these HC20 clusters is summarized in Tables 2, 4 and 5, and an interactive version of both trees can be accessed at [https://enterobase.warwick.ac.uk/ms\\_tree?tree\\_id=45421](https://enterobase.warwick.ac.uk/ms_tree?tree_id=45421) and [https://enterobase.warwick.ac.uk/ms\\_tree?tree\\_id=60146](https://enterobase.warwick.ac.uk/ms_tree?tree_id=60146).
