# Supplementary material for: Genomic population structure associated with repeated escape of Salmonella enterica ATCC14028s from the laboratory into nature
Source: PubMed Central journal article supplement (PMC8496778; doi:10.1371/journal.pgen.1009820), 2021-09-27

A

HC5\_20633 NCTC 7832  
 Serovar Nottingham  
 Laboratory ?  
 2000-2020

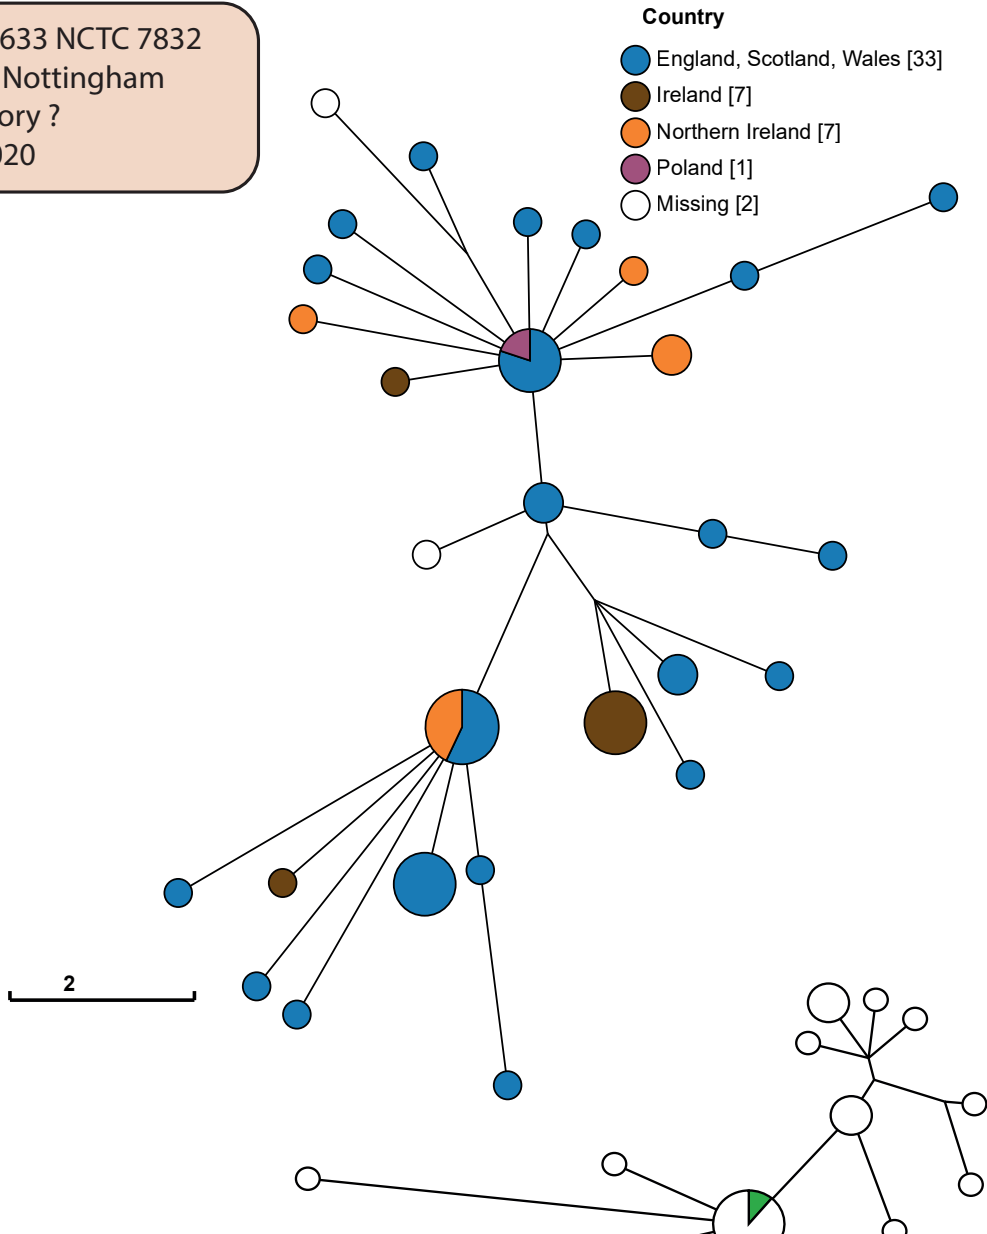

**S9 Fig.** Ninja NJ visualization of allelic differences in the 3002 core genes of the cgMLST *Salmonella* scheme with GrapeTree for genomes within A) HC20\_20633 and B) HC20\_5519.

Further information on these HC20 clusters is summarized in Tables 2, 4 and 5, and an interactive version of both trees can be accessed at

[https://enterobase.warwick.ac.uk/ms\\_tree?tree\\_id=60214](https://enterobase.warwick.ac.uk/ms_tree?tree_id=60214)

and [https://enterobase.warwick.ac.uk/ms\\_tree?tree\\_id=60272](https://enterobase.warwick.ac.uk/ms_tree?tree_id=60272).

B

HC20\_5519 SL1344  
 Serovar Typhimurium  
 Laboratory  
 2002-2018

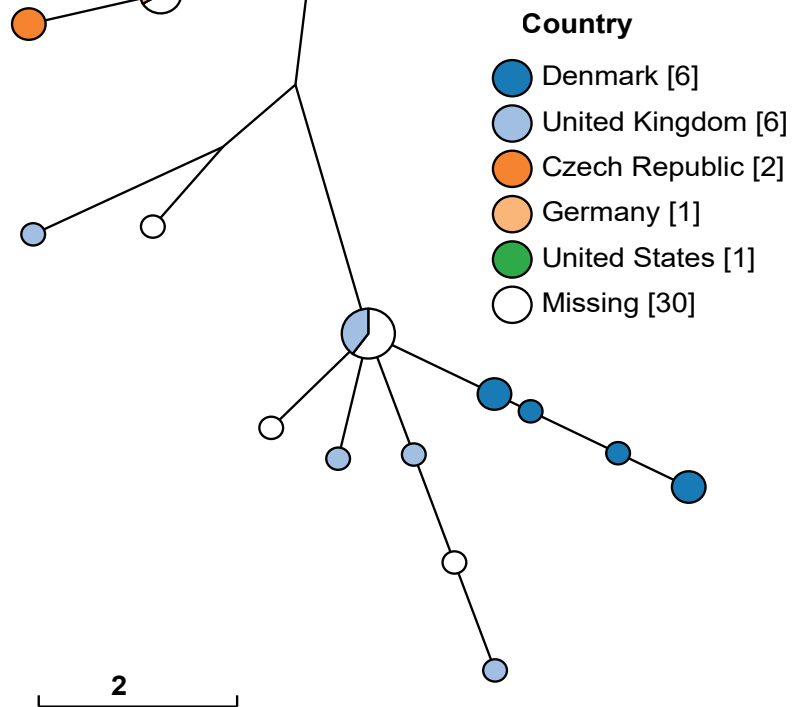

Supplement: pgen.1009820.s017.pdf [file pgen.1009820.s017.pdf]
